# Supplementary material for: Spatiotemporal control of interferon-induced JAK/STAT signalling and gene transcription by the retromer complex
Source: PubMed Central journal article supplement (PMC5150223; doi:10.1038/ncomms13476), 2016-12-05
Supplement: ncomms13476-s1.pdf [file ncomms13476-s1.pdf]

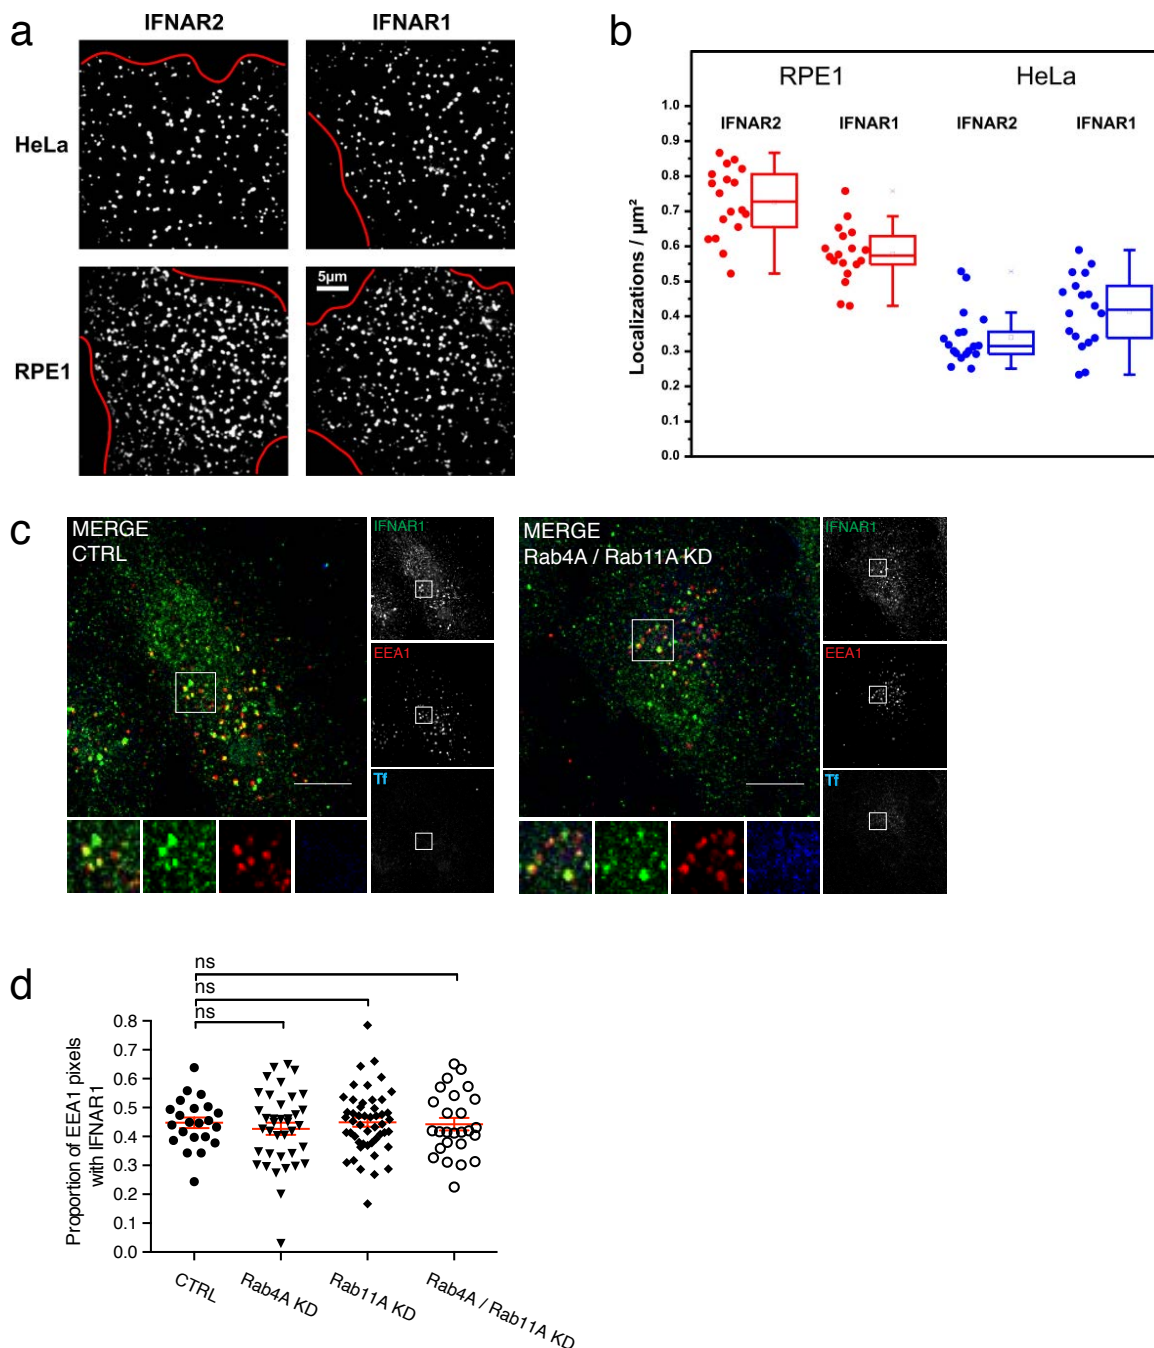

**Supplementary Figure 1. (a-b)** Quantification of IFNAR1 and IFNAR2 subunits cell surface expression in RPE1 and HeLa cells. **(a)** TIRF microscopy images of HeLa and RPE1 cells after addition of 4 nM DY647-conjugated IFN mutants. The localization density of cell-bound <sup>DY647</sup>IFN $\alpha$ 2- $\alpha$ 8tail-R120E was used to determine cell surface IFNAR2 levels whereas <sup>DY647</sup>IFN $\alpha$ 2-YNS-M148A was taken to quantify IFNAR1 levels. The boundaries of the cells are indicated by a red line. Scale bar 5  $\mu$ m. **(b)** RPE1 cells express 0,58 IFNAR1 per  $\mu$ m<sup>2</sup> and 0,72 IFNAR2 per  $\mu$ m<sup>2</sup> subunits whereas HeLa cells express 0,41 IFNAR1 per  $\mu$ m<sup>2</sup> and 0,34 IFNAR2 per  $\mu$ m<sup>2</sup> subunits. **(c-d)**: IFNAR1 intracellular trafficking is independent from Rab11A and Rab4A. **(c)** Uptake of Transferrin-Alexa647 conjugate and IFNAR1 subunit in control (CTRL) and Rab4A / Rab11A depleted RPE1 cells upon 60 min IFN- $\alpha$  stimulation. Following fixation, cells were co-labeled for EEA1 and analyzed by confocal microscopy. Scale bar 10  $\mu$ m. **(d)** Quantification of colocalization in **c** expressed as the Manders' coefficient indicating the proportion of EEA1 pixels containing IFNAR1 pixels in CTRL, Rab4A, Rab11A or Rab4A/Rab11A depleted RPE1 cells. **Reproducibility of experiments: a-b** (n=18 cells per condition) show representative data for 2 independent experiments. Data distribution of the second + the third quartile, median (line), mean (empty square) and whiskers (1.5x interquartile range) is shown. **c-d** (n=22, n=38, n=49 and n=26 cells, respectively, for each condition) show representative data for 3 independent experiments. Mean value  $\pm$  SEM. Statistical analysis with one-way ANOVA and Dunnett's multiple comparison test was performed; ns = non-significant.

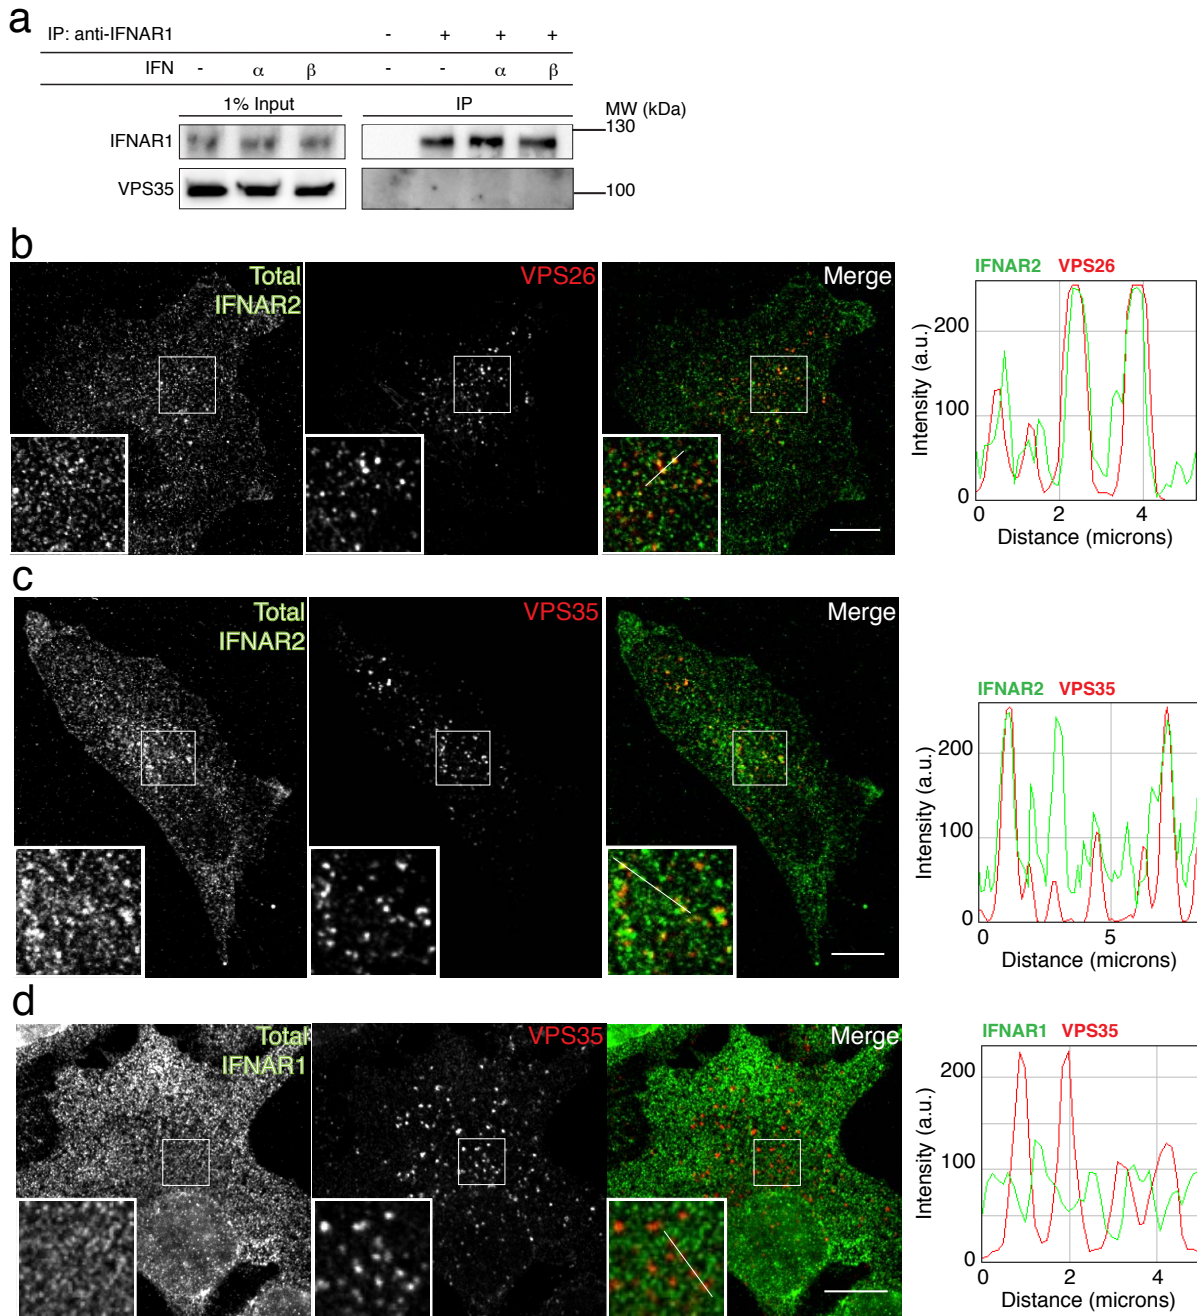

**Supplementary Figure 2. IFNAR1 and IFNAR2 interaction with the retromer.** (a) Untransfected RPE1 cells were stimulated or not (-) with IFN- $\alpha$  or IFN- $\beta$  as indicated. Cell lysates were incubated with anti-IFNAR1 antibody to immunoprecipitate (IP) endogenous IFNAR1 and reveal co-immunoprecipitated endogenous VPS35. (b,c) Immunofluorescent labeling of total IFNAR2 in RPE1 cells with: (b) VPS26 with representative histogram of colocalization profile (c) VPS35 with representative histogram of colocalization profile. (d) Immunofluorescent labeling of total IFNAR1 and VPS35 in RPE1 cells with representative histogram of colocalization profile. Scale bars 10  $\mu$ m. **Reproducibility of experiments:** a-d show representative data for 3 independent experiments.

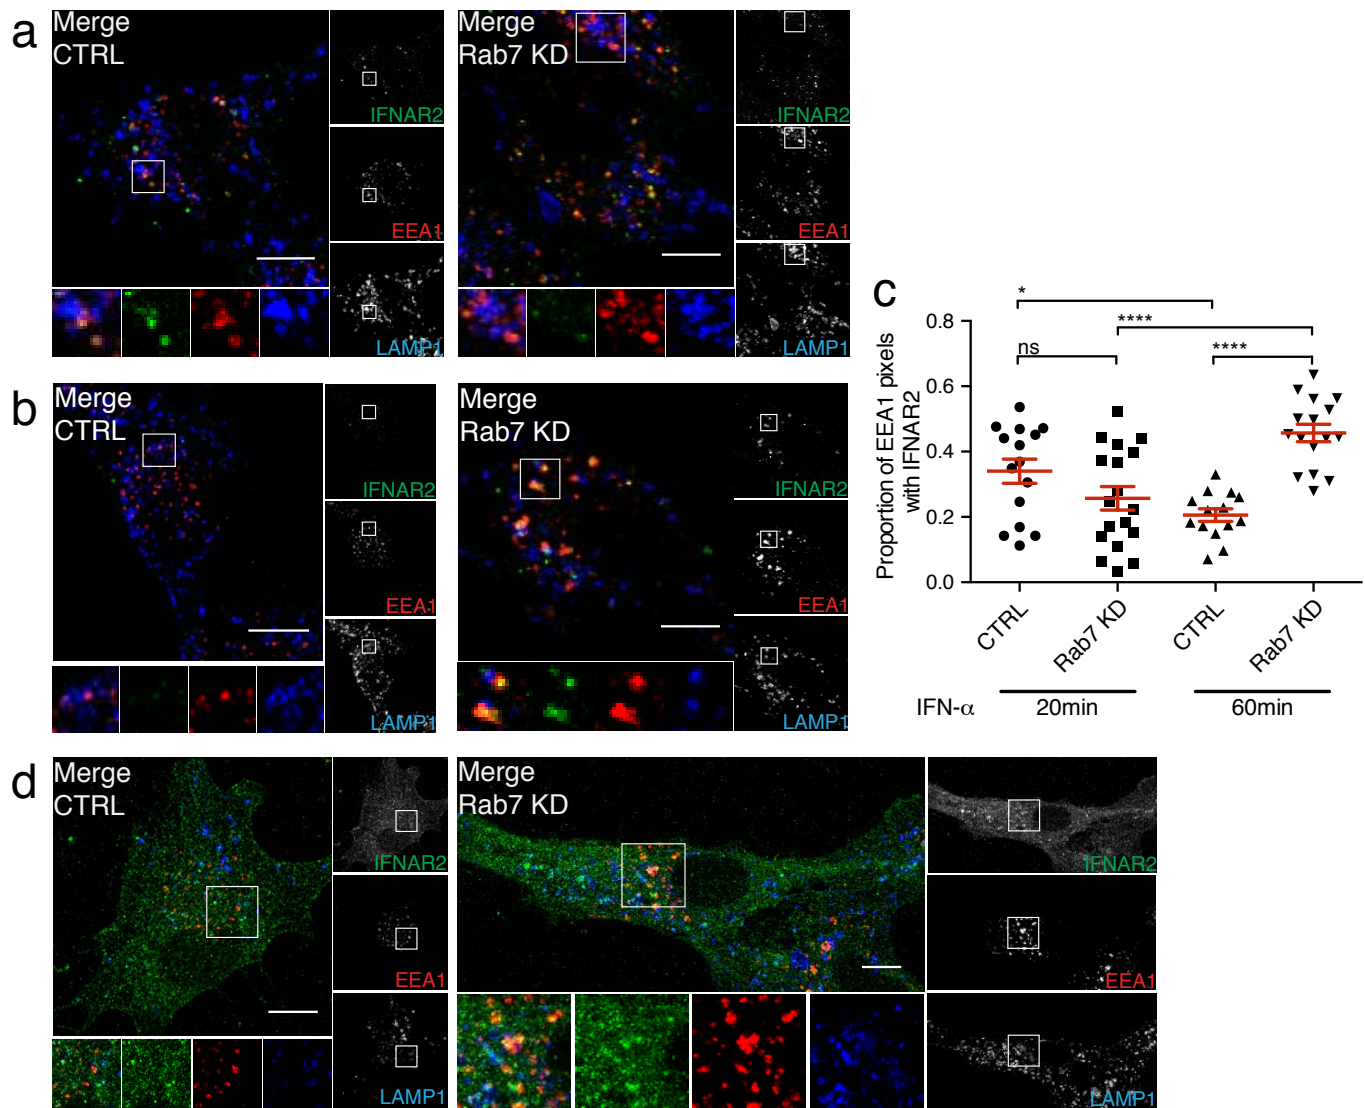

**Supplementary Figure 3. Effect of Rab7A depletion on IFNAR2 trafficking in RPE1 cells.** (a,b) Immunofluorescent labeling of endocytosed IFNAR2 in CTRL and Rab7A depleted cells after 20 min (a) and 60 min (b) IFNAR uptake under IFN- $\alpha$  stimulation. Cells were fixed, co-labeled for EEA1 and LAMP1, and analyzed by confocal microscopy. (c) Quantification of colocalization in a,b expressed as the Manders' coefficient indicating the proportion of EEA1 pixels containing IFNAR2 pixels. (d) Immunofluorescent labeling of total IFNAR2, EEA1 and LAMP1 in CTRL and Rab7A depleted cells, observed by confocal microscopy. Scale bars 10  $\mu$ m. **Reproducibility of experiments:** a-d show representative data for 3 independent experiments. Graph c – shows quantification of 20 min: n=15 and n=18 cells respectively; 60 min: n=14 cells and n=16 cells, respectively, for each condition. Mean value  $\pm$  SEM. Statistical analysis with one-way ANOVA and Sidak's multiple comparison test was performed. \* $P$ <0.05; \*\*\*\* $P$ <0.0001; ns = non-significant.

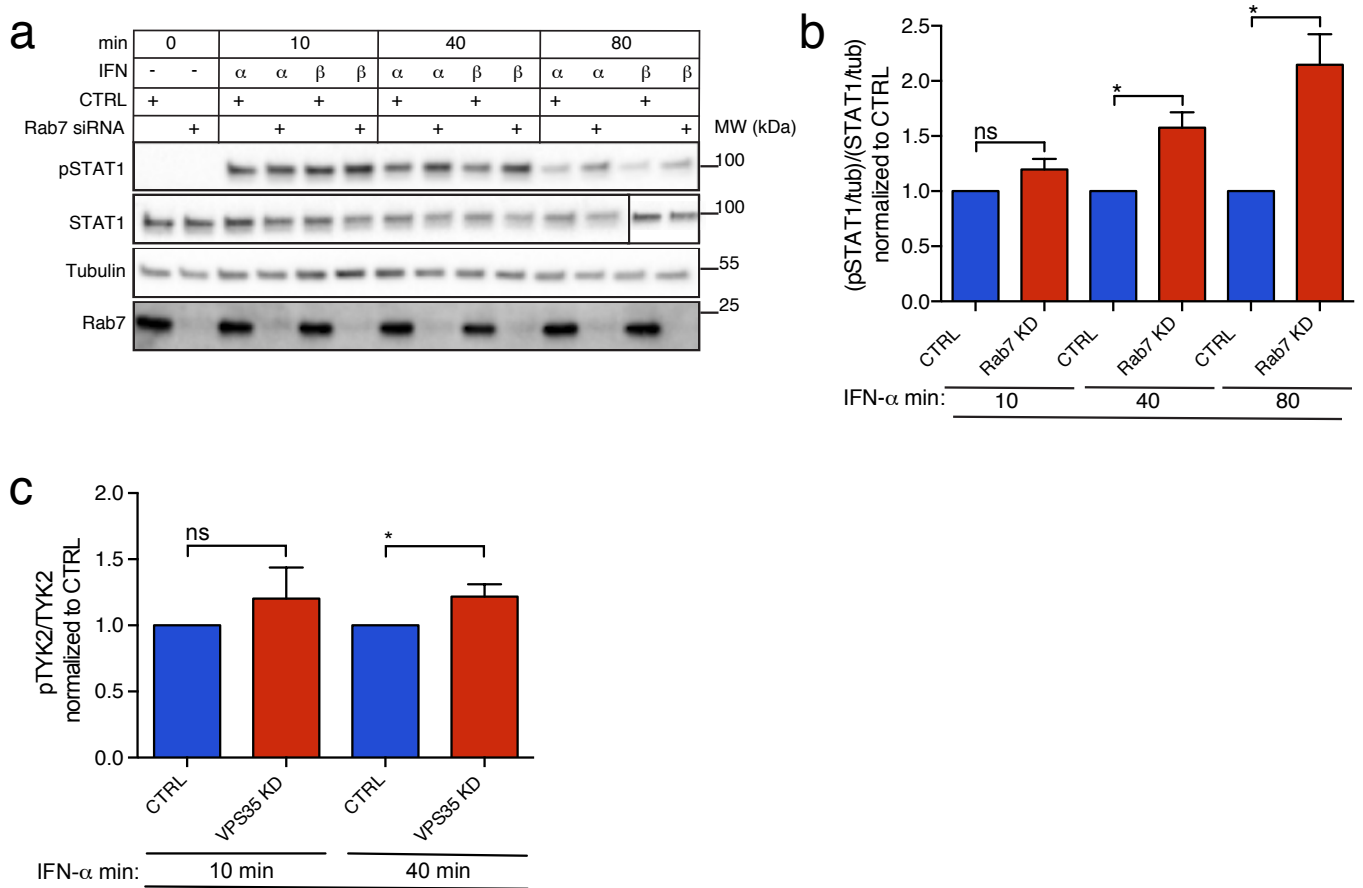

**Supplementary Figure 4. Effect of Rab7A and VPS35 depletion on JAK/STAT signaling in RPE1 cells.** (a) Immunoblots for tyrosine phosphorylation levels of STAT1 (pSTAT1) in CTRL and Rab7A depleted RPE1 cells stimulated with IFN- $\alpha$  or IFN- $\beta$  for the indicated times. (b) Quantification of experiments performed in a: pSTAT1 and STAT1 levels were normalized to tubulin (tub) level (loading control) and the ratio (pSTAT1/tub)/(STAT1/tub) was calculated for each condition. STAT1 activation upon Rab7 depletion was normalized to CTRL as 1. (c) Quantification of tyrosine phosphorylation levels of TYK2 (pTYK2) in CTRL and VPS35 depleted RPE1 cells stimulated with IFN- $\alpha$  for the indicated times. Ratio of pTYK2 level to the total TYK2 level was calculated for each condition. TYK2 activation upon VPS35 depletion was normalized to CTRL as 1. **Reproducibility of experiments:** a shows representative data for 3 independent experiments, b shows quantification of 3 independent experiments and c shows quantification of 7 independent experiments. Graphs b-c show mean value  $\pm$  SEM, statistical analysis with two-tailed, unpaired t-test was performed. \* $P$ <0.05; ns = non-significant.

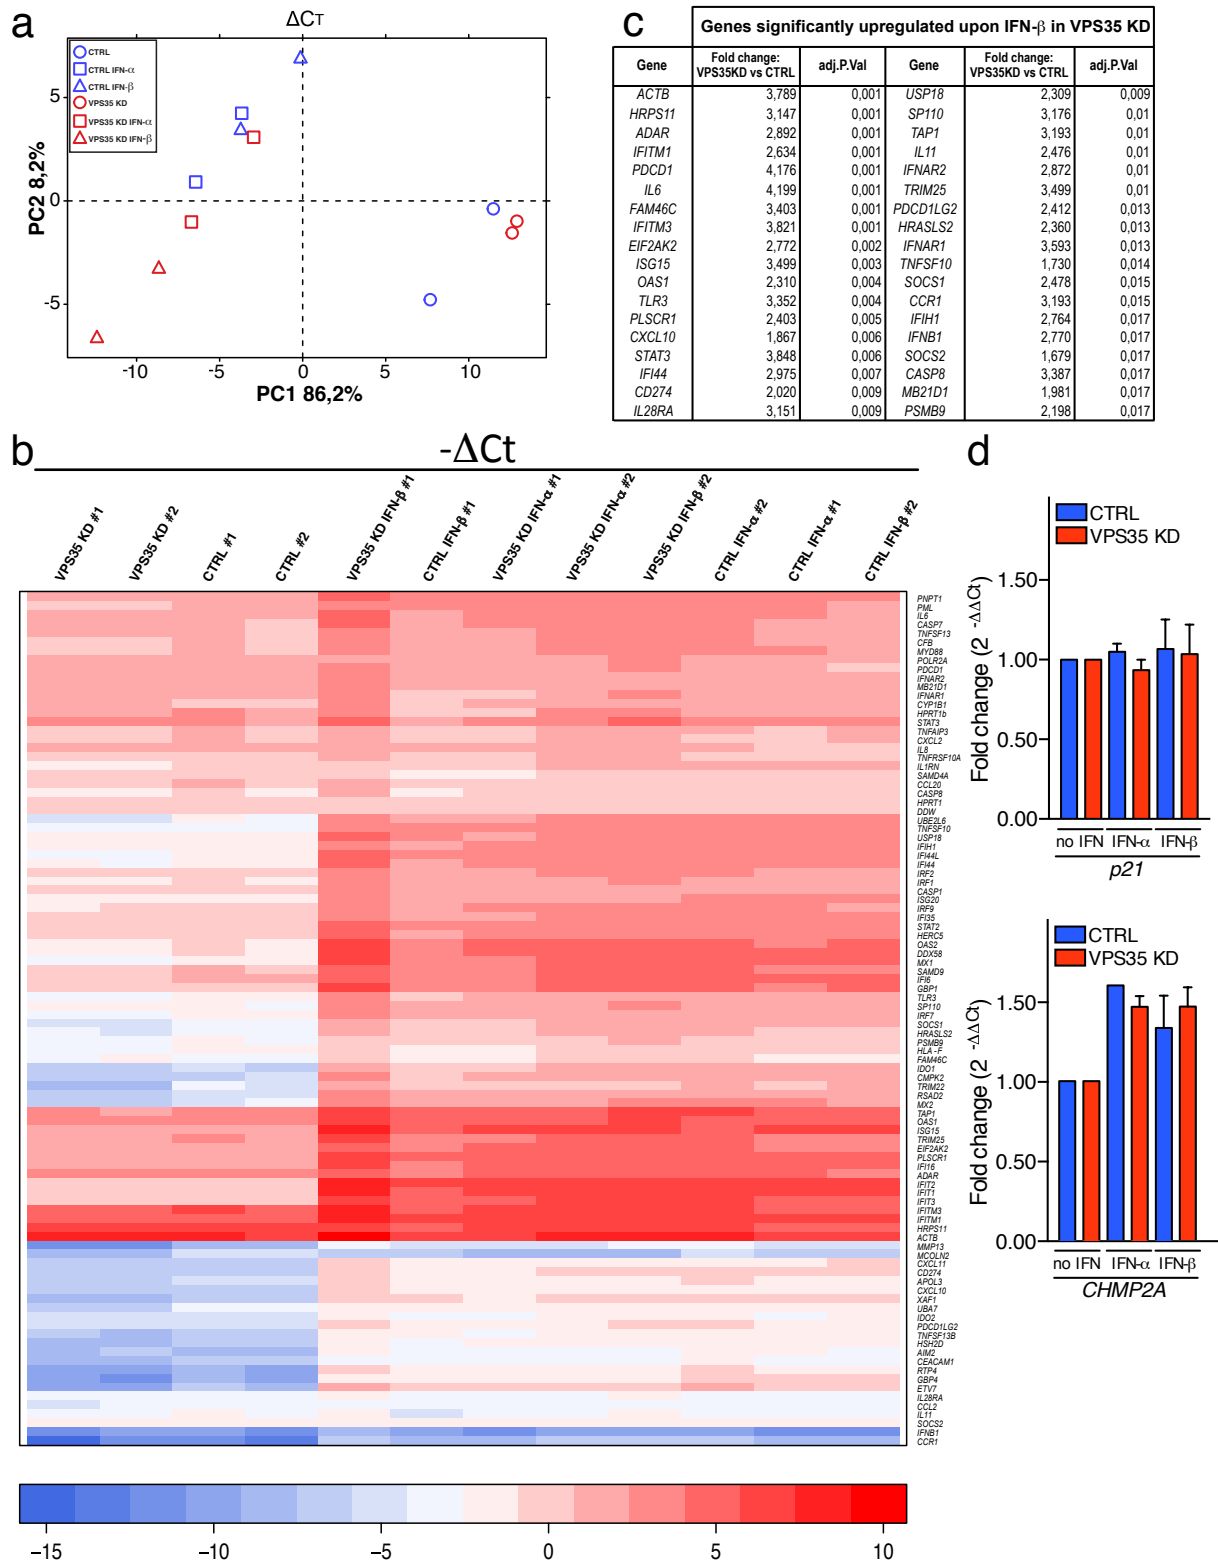

**Supplementary Figure 5. Gene expression analysis in WISH cells.** (a) Principal component analysis (PCA) using  $\Delta CT$  value in CTRL and VPS35 depleted WISH cells with or without IFN- $\alpha$  or IFN- $\beta$  stimulation for all samples replicates. (b) Clustering analysis based on  $-\Delta Ct$  values for gene expression in CTRL and VPS35 depleted WISH cells with or without IFN- $\alpha$  or IFN- $\beta$  stimulation for all samples replicates. Each square represents a value for a given gene (row) for a specific condition (column). Genes depicted in blue are expressed at low level (low  $-\Delta Ct$  value); genes depicted in red are expressed at high level (high  $-\Delta Ct$  value). (c) Genes significantly upregulated by IFN- $\beta$  stimulation in VPS35 depleted WISH cells. (d) Expression of IFN-independent genes: *p21* (upper panel), and *CHMP2A* (lower panel) in CTRL and in VPS35-depleted WISH cells with or without IFN- $\alpha$  or IFN- $\beta$  stimulation. Mean value  $\pm$  SEM. Quantification of 2 independent experiments.

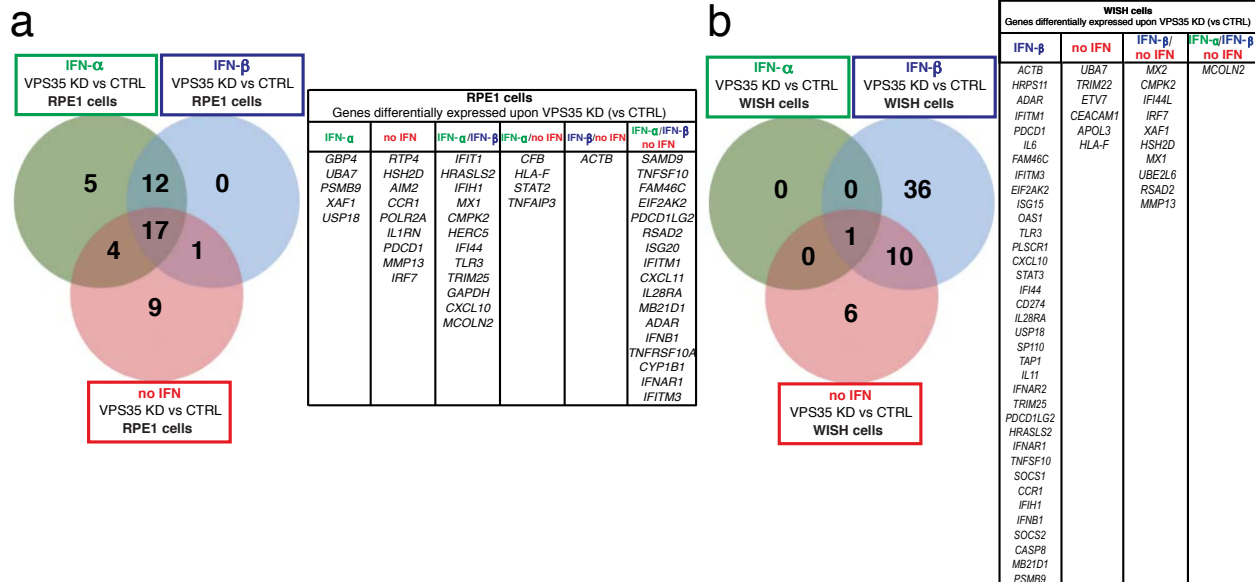

**Supplementary Figure 6. Comparative analysis of IFN-dependent genes in CTRL vs. VPS35 depleted WISH and RPE1 cells.** (a) RPE1 cells. Venn Diagram representing differentially expressed genes upon stimulation without (red circle) or with IFN- $\alpha$  (green circle), or IFN- $\beta$  (blue circle) in CTRL vs. VPS35 depleted cells. Table listing the genes that are differentially expressed for each condition in RPE1 cells (right). (b) WISH cells. Venn Diagram representing differentially expressed genes without (red circle) or with IFN- $\alpha$  (green circle) or IFN- $\beta$  (blue circle) stimulation in CTRL vs. VPS35 depleted cells. Table listing the genes that are differentially expressed for each condition in WISH cells (right). (c) RPE1 vs. WISH cells. Venn Diagrams representing differentially expressed genes without (left panel) or with IFN- $\alpha$  (middle panel) or IFN- $\beta$  stimulation (right panel) in CTRL vs. VPS35 depleted cells in RPE1 (green circle) and WISH (blue circle) cells. Table listing the genes that are differentially expressed for each condition (lower panel).

Fig. 1e IFNAR1

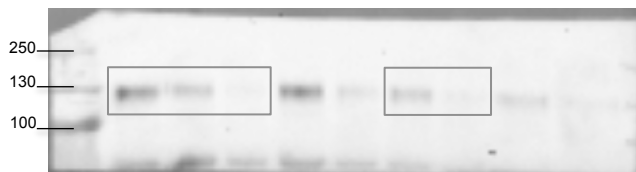

Fig. 1e IFNAR2

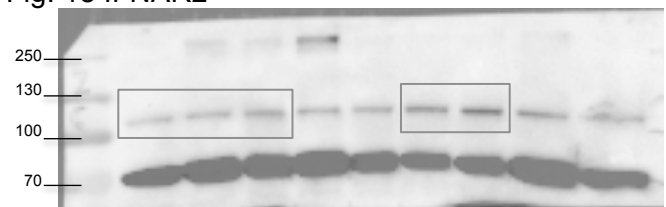

Fig. 1e tubulin

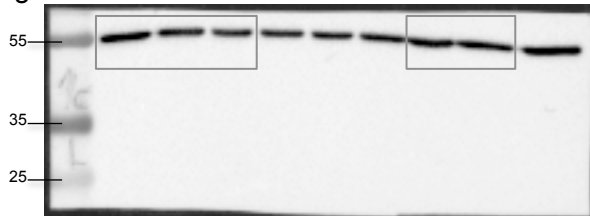

Fig. 1g IFNAR1

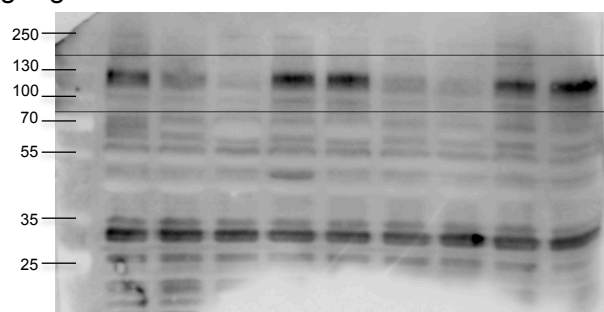

Fig. 2a Rab4

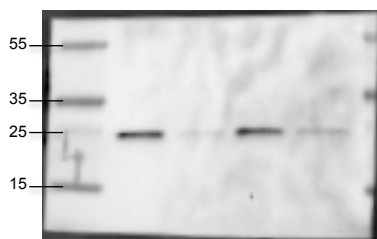

Fig. 2a Rab11

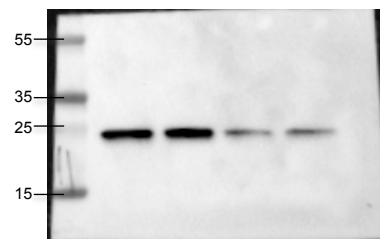

Fig. 2a CHC

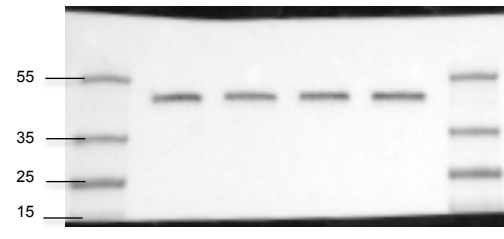

Fig. 3a 1% Input IFNAR2

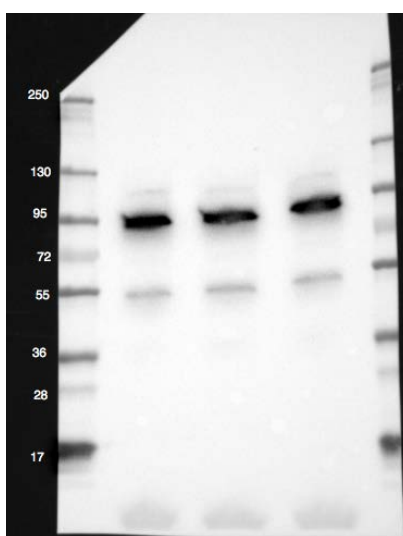

Fig. 3a 1% Input VPS35

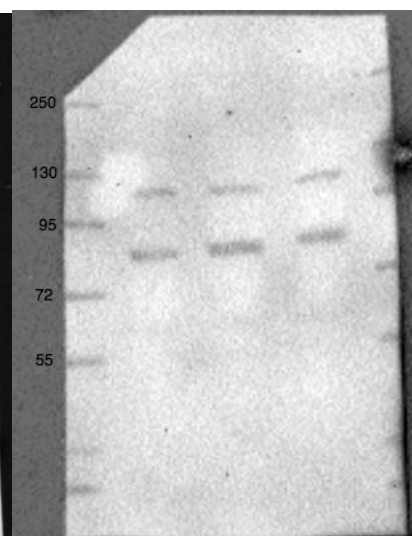

Fig. 3a VPS35 IP

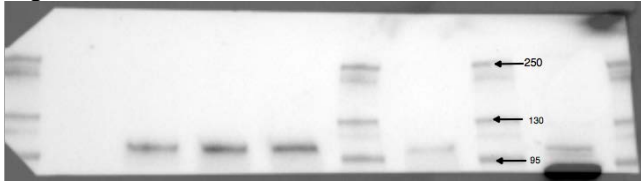

Fig. 3a IFNAR2 IP

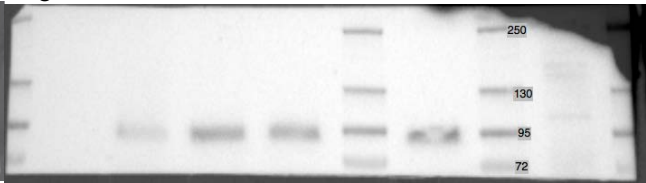

Fig. 3b IFNAR2 1% Input

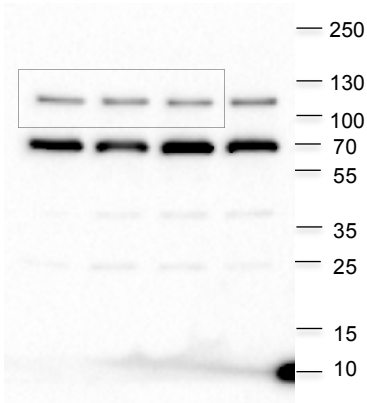

Fig. 3b VPS35 1% Input

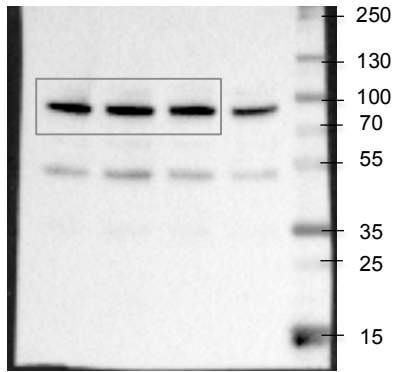

Fig. 3b IFNAR1 1% Input

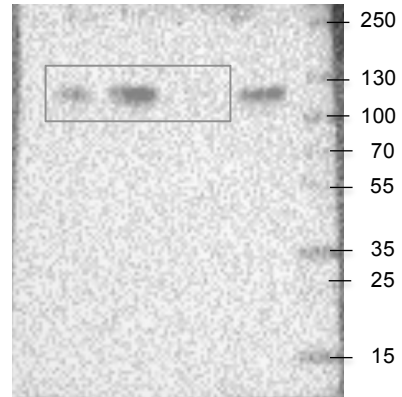

Fig. 3b IFNAR2 IP

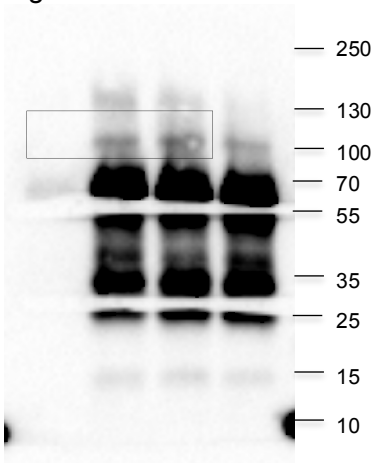

Fig. 3b VPS35 IP

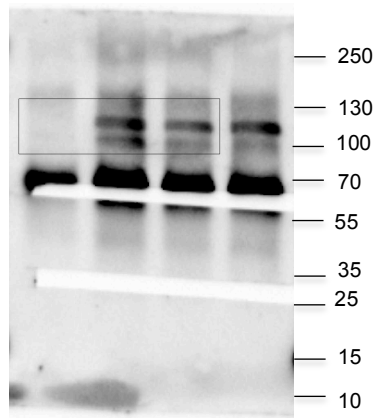

Fig. 4e CHC

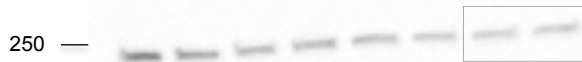

Fig. 4e VPS35

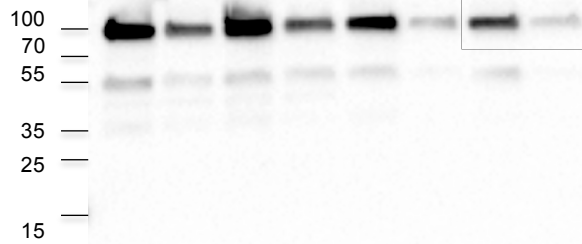



Fig. 6b SNAP

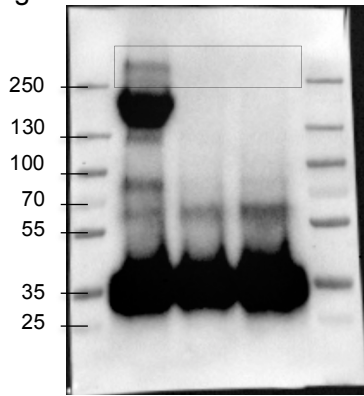

Fig. 7a pSTAT1 0min, 10 min, 40 min

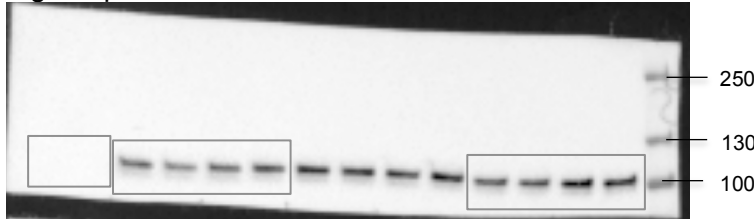

Fig. 7a pSTAT1 60 min

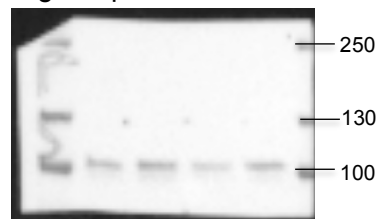

Fig. 7a STAT1 0 min, 10 min, 40 min

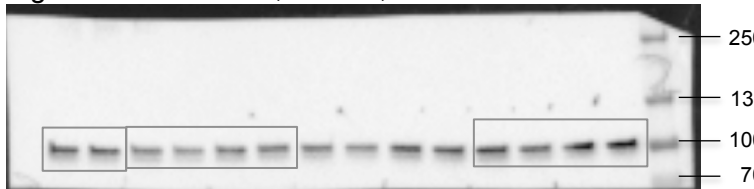

Fig. 7a STAT1 60 min

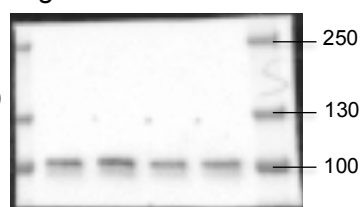

Fig. 7a tubulin 0min, 10 min, 40 min

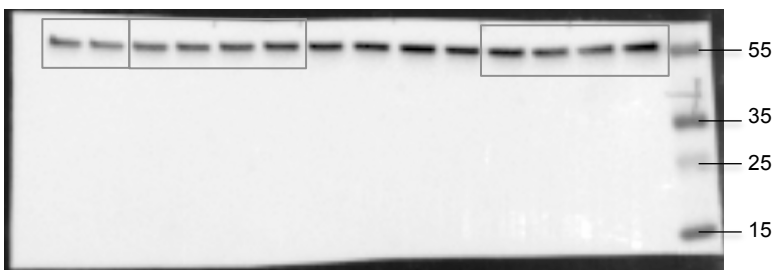

Fig. 7a tubulin 60 min

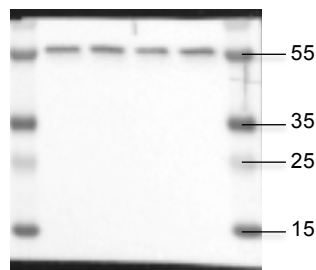

Supplementary Fig. 2a IFNAR1 1% Input

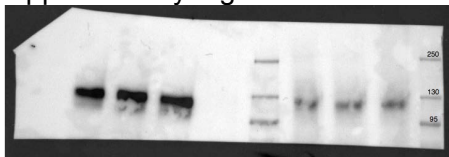

Supplementary Fig. 2a VPS35 1% Input

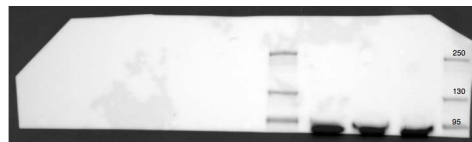

Supplementary Fig. 2a IFNAR1 IP

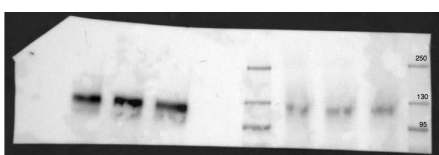

Supplementary Fig. 2a VPS35 IP

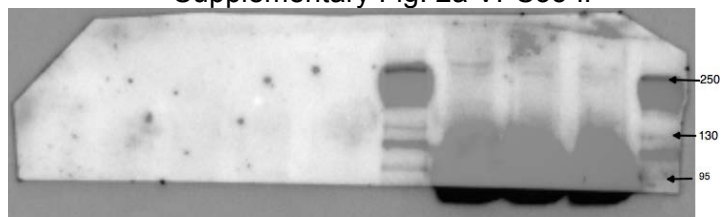

Supplementary Fig. 4a pSTAT1

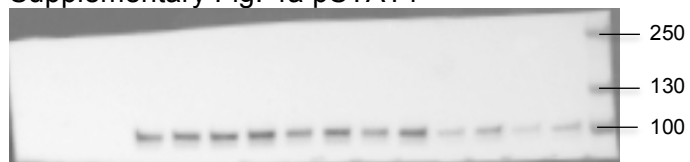

Supplementary Fig. 4a STAT1 0min, 10min, 40min, 80min IFNa

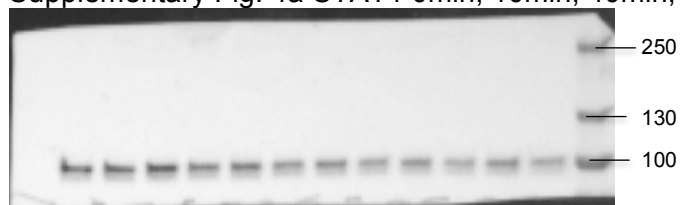

80min IFNb

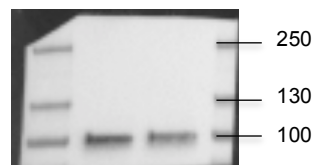

Supplementary Fig. 4a tubulin

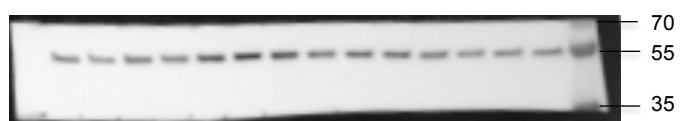

Supplementary Fig. 4a Rab7

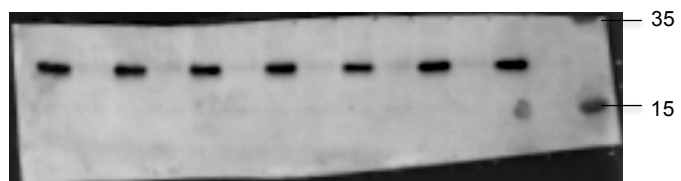

| Selected proteins | Peptides  |          |           |          |                     |          |                    |          | MW (kDa) | Description                                                   |
|-------------------|-----------|----------|-----------|----------|---------------------|----------|--------------------|----------|----------|---------------------------------------------------------------|
|                   | Beads     |          | Ctrl      |          | 10 min IFN $\alpha$ |          | 10 min IFN $\beta$ |          |          |                                                               |
| IFNAR2            | -         | -        | <b>1</b>  | <i>1</i> | -                   | -        | <b>1</b>           | <i>1</i> | 57,8     | Interferon alpha/beta receptor 2                              |
| STAT1             | -         | -        | <b>3</b>  | <i>2</i> | <b>1</b>            | <i>1</i> | <b>4</b>           | <i>1</i> | 87,3     | Signal transducer and activator of transcription 1-alpha/beta |
| CLH1              | <b>13</b> | <i>6</i> | <b>21</b> | <i>6</i> | <b>4</b>            | <i>4</i> | <b>12</b>          | <i>3</i> | 191,6    | Clathrin heavy chain 1                                        |
| AP2A1             | <b>1</b>  | <i>2</i> | <b>3</b>  | <i>4</i> | <b>1</b>            | <i>1</i> | <b>1</b>           | <i>2</i> | 107,5    | AP-2 complex subunit alpha-1                                  |
| AP2B1             | -         | -        | <b>1</b>  | <i>3</i> | -                   | -        | <b>3</b>           | <i>1</i> | 104,6    | AP-2 complex subunit beta                                     |
| AP2M1             | -         | -        | <b>2</b>  | <i>1</i> | -                   | -        | -                  | -        | 49,7     | AP-2 complex subunit mu                                       |
| EEA1              | <b>1</b>  | <i>2</i> | <b>3</b>  | <i>1</i> | -                   | -        | <b>1</b>           | <i>1</i> | 162,5    | Early endosome antigen 1                                      |
| RAB5A             | -         | -        | -         | -        | -                   | -        | <b>2</b>           | <i>1</i> | 23,7     | Ras-related protein Rab-5A                                    |
| RAB5C             | <b>5</b>  | <i>1</i> | <b>4</b>  | <i>1</i> | <b>3</b>            | <i>1</i> | <b>4</b>           | <i>1</i> | 23,5     | Ras-related protein Rab-5C                                    |
| RAB7A             | <b>5</b>  | <i>1</i> | <b>5</b>  | <i>2</i> | <b>3</b>            | <i>1</i> | <b>3</b>           | <i>1</i> | 23,5     | Ras-related protein Rab-7a                                    |
| RAB10             | <b>1</b>  | <i>1</i> | <b>2</b>  | <i>1</i> | <b>1</b>            | <i>1</i> | <b>1</b>           | <i>1</i> | 22,5     | Ras-related protein Rab-10                                    |
| RAB11A            | <b>4</b>  | <i>1</i> | <b>5</b>  | <i>1</i> | <b>1</b>            | <i>1</i> | <b>1</b>           | <i>1</i> |          | Ras-related protein Rab-11A                                   |
| RAB14             | <b>4</b>  | <i>1</i> | <b>5</b>  | <i>1</i> | <b>2</b>            | <i>1</i> | <b>2</b>           | <i>1</i> | 23,9     | Ras-related protein Rab-14                                    |
| RAB15             | <b>1</b>  | <i>2</i> | <b>1</b>  | <i>3</i> | <b>1</b>            | <i>2</i> | <b>1</b>           | <i>1</i> | 24,4     | Ras-related protein Rab-15                                    |
| RAB18             | <b>3</b>  | <i>1</i> | <b>7</b>  | <i>1</i> | <b>1</b>            | <i>1</i> | <b>4</b>           | <i>1</i> | 23,0     | Ras-related protein Rab-18                                    |
| RAB35             | <b>1</b>  | <i>2</i> | <b>2</b>  | <i>1</i> | <b>1</b>            | <i>1</i> | <b>1</b>           | <i>1</i> | 23,0     | Ras-related protein Rab-35                                    |
| VPS35             | <b>1</b>  | <i>1</i> | <b>5</b>  | <i>2</i> | <b>4</b>            | <i>1</i> | <b>4</b>           | <i>1</i> | 91,7     | Vacuolar protein sorting-associated protein 35                |
| VPS29             | -         | -        | <b>2</b>  | <i>1</i> | <b>1</b>            | <i>1</i> | -                  | -        | 20,5     | Vacuolar protein sorting-associated protein 29                |
| VPS26A            | <b>3</b>  | <i>1</i> | <b>3</b>  | <i>2</i> | <b>1</b>            | <i>1</i> | <b>2</b>           | <i>1</i> |          | Vacuolar protein sorting-associated protein 26A               |
| SNX5              | -         | -        | <b>1</b>  | <i>1</i> | -                   | -        | <b>1</b>           | <i>1</i> | 46,8     | Sorting nexin-5                                               |
| SNX2              | -         | -        | -         | -        | -                   | -        | <b>1</b>           | <i>1</i> | 58,5     | Sorting nexin-2                                               |
| SNX4              | -         | -        | <b>1</b>  | <i>1</i> | -                   | -        | -                  | -        | 51,9     | Sorting nexin-4                                               |
| LAMP1             | <b>2</b>  | <i>4</i> | <b>3</b>  | <i>1</i> | <b>2</b>            | <i>2</i> | <b>3</b>           | <i>1</i> | 44,9     | Lysosome-associated membrane glycoprotein 1                   |
| LAMP2             | <b>2</b>  | <i>3</i> | <b>2</b>  | <i>5</i> | <b>1</b>            | <i>1</i> | <b>2</b>           | <i>2</i> | 45,0     | Lysosome-associated membrane glycoprotein 2                   |
| CD63              | <b>3</b>  | <i>3</i> | <b>4</b>  | <i>2</i> | <b>2</b>            | <i>1</i> | <b>3</b>           | <i>1</i> | 25,6     | CD63 antigen                                                  |

**Supplementary Table 1.** Chosen partners of endogenous IFNAR2 as analyzed by mass spectrometry. The numbers in **bold**: number of protein peptides found in the band with the highest concentration of the given protein peptides; numbers in *italics*: total number of bands in which peptides of the given protein were found.
